# Supplementary material for: Prevalence and determinants of physical violence against doctors in Bangladeshi tertiary care hospitals
Source: PubMed Central journal article supplement (PMC10045192; doi:10.1186/s12960-023-00811-x), 2023-03-28
Supplement: 12960_2023_811_MOESM1_ESM.pdf [file 12960_2023_811_MOESM1_ESM.pdf]

## Prevalence and determinants of physical violence against doctors in Bangladeshi tertiary care hospitals

| <b>Personal information</b>                                                                    |                                                                                               |                                                                                                                                                                                                                                                                                                                                                                                                                       |
|------------------------------------------------------------------------------------------------|-----------------------------------------------------------------------------------------------|-----------------------------------------------------------------------------------------------------------------------------------------------------------------------------------------------------------------------------------------------------------------------------------------------------------------------------------------------------------------------------------------------------------------------|
| <b>P1</b>                                                                                      | Gender                                                                                        | <input type="checkbox"/> Male <input type="checkbox"/> Female                                                                                                                                                                                                                                                                                                                                                         |
| <b>P2</b>                                                                                      | Age (year)                                                                                    |                                                                                                                                                                                                                                                                                                                                                                                                                       |
| <b>P3</b>                                                                                      | Marital status                                                                                | <input type="checkbox"/> never married <input type="checkbox"/> married                                                                                                                                                                                                                                                                                                                                               |
| <b>P4</b>                                                                                      | Employment                                                                                    | <input type="checkbox"/> public <input type="checkbox"/> private                                                                                                                                                                                                                                                                                                                                                      |
| <b>P5</b>                                                                                      | Job types                                                                                     | <input type="checkbox"/> permanent <input type="checkbox"/> contractual                                                                                                                                                                                                                                                                                                                                               |
| <b>P6</b>                                                                                      | Working department                                                                            | <input type="checkbox"/> general medicine <input type="checkbox"/> general surgery<br><input type="checkbox"/> emergency <input type="checkbox"/> intensive care<br><input type="checkbox"/> management <input type="checkbox"/> pediatrics<br><input type="checkbox"/> gynae & obs <input type="checkbox"/> orthopedics<br><input type="checkbox"/> dermatology <input type="checkbox"/> others, please specify_____ |
| <b>Physical violence related information</b>                                                   |                                                                                               |                                                                                                                                                                                                                                                                                                                                                                                                                       |
| <i>Note: Physical violence refers to pinching, pushing, shoving, kicking, raped attempted.</i> |                                                                                               |                                                                                                                                                                                                                                                                                                                                                                                                                       |
| <b>PV1</b>                                                                                     | <b>In the last 12 months</b> , have you been a victim of physical violence in your workplace? | <input type="checkbox"/> Yes<br><input type="checkbox"/> No; <i>if No, stop here please.</i>                                                                                                                                                                                                                                                                                                                          |
| <b>PV2</b>                                                                                     | Who was aggressive towards you?                                                               | <input type="checkbox"/> patient <input type="checkbox"/> relatives of patient<br><input type="checkbox"/> staff member <input type="checkbox"/> visitors/unknown<br><input type="checkbox"/> other.....                                                                                                                                                                                                              |
| <b>PV3</b>                                                                                     | Were you injured as a result of the violent incident?                                         | <input type="checkbox"/> yes <input type="checkbox"/> no                                                                                                                                                                                                                                                                                                                                                              |
| <b>PV4</b>                                                                                     | Did you have to take time off from work after being attacked?                                 | <input type="checkbox"/> yes <input type="checkbox"/> no                                                                                                                                                                                                                                                                                                                                                              |
| <b>PV5</b>                                                                                     | Do you think the incident could have been prevented?                                          | <input type="checkbox"/> yes <input type="checkbox"/> no                                                                                                                                                                                                                                                                                                                                                              |
| <b>PV6</b>                                                                                     | What were the consequences for the attacker?                                                  | <input type="checkbox"/> None <input type="checkbox"/> verbal warning issued<br><input type="checkbox"/> care discontinued <input type="checkbox"/> reported to police<br><input type="checkbox"/> other:_____ <input type="checkbox"/> don't know                                                                                                                                                                    |
| <b>PV7</b>                                                                                     | Did your employer or supervisor offer to provide you any support?                             | <input type="checkbox"/> yes <input type="checkbox"/> no                                                                                                                                                                                                                                                                                                                                                              |
| <b>PV8</b>                                                                                     | How worried are you about violence in your current workplace?                                 | <input type="checkbox"/> not at all <input type="checkbox"/> a little <input type="checkbox"/> worried<br><input type="checkbox"/> very worried                                                                                                                                                                                                                                                                       |
| <b>Suggestion for tackling physical violence</b>                                               |                                                                                               |                                                                                                                                                                                                                                                                                                                                                                                                                       |
| <b>S1</b>                                                                                      | To what extent do you think these measures would be helpful in your work setting?             | <input type="checkbox"/> Increase doctors<br><input type="checkbox"/> Patient protocols<br><input type="checkbox"/> Reduced periods of working alone<br><input type="checkbox"/> Training for tackling violence<br><input type="checkbox"/> Others, specify please: .....                                                                                                                                             |

Thank you for your contribution
